# Supplementary material
Source: Springer Nature journal article supplement (https://www.springermedizin.de/resource/supplementary/13046_2008_91_MOESM2_ESM.pdf/9661684)

**M14****FRM****Cell proliferation**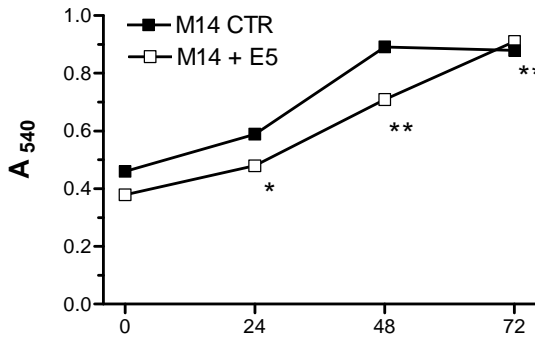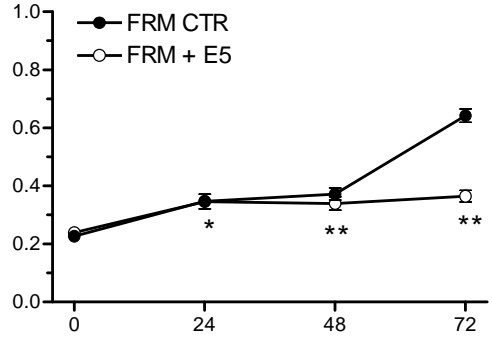**Cell viability**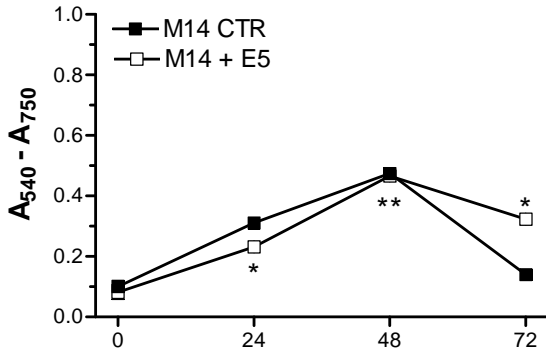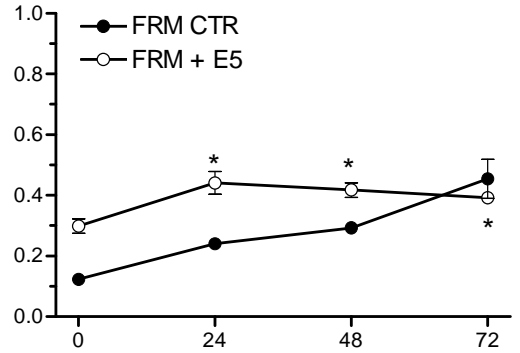**Specific metabolic activity**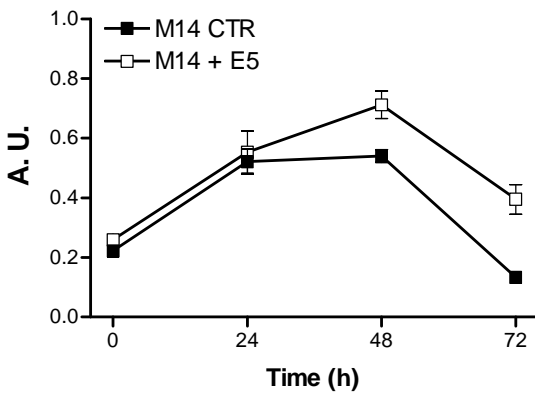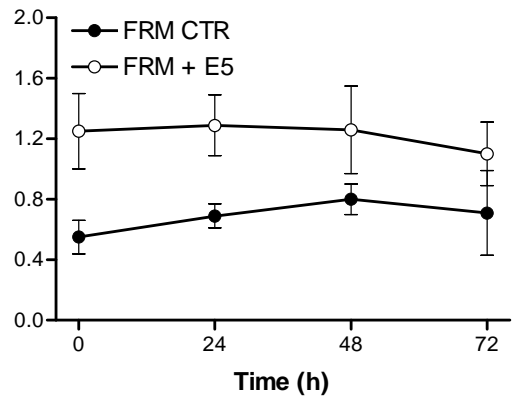

Supplement: MOESM2 [file 9661684]
